# Supplementary material
Source: publisher figshare collection journal article supplement (https://gsajournals.figshare.com/ndownloader/files/22007655)
Supplement: Supplementary file 1 [file 22007655]

**File S4.**  Five sets of amino acid alignments of closely linked putative effector peptides and called secreted RxLR effectors within the same gene families.

**Set 1**

| PmGH34_PBPs_010 | g537330 | Secreted RxLR effector |
| --- | --- | --- |
| PmGH34_PBPs_010 | g537340 | Putative effector peptide |

>g537330

MNKAFLHIRNLRVTILLAVVIFQSCISATSTDFPIINSSSLYLTSRLDQNVVQNKRNLRI

HVLATTEDSSDERGINLGATTVAKLKDLTTSATQKLEKFAVSAKLKTLKNNQLATDKSFA

KFDVGTSKSNVFESARFQKWFNSVHKAYKQNVEESEVAVVTTLTKHYGDESLTKLLSEAK

TIPNTKVIAEKLEDARLTKWLTEQKSVDDIFNLLKLDETGENIFKSPLLSSWVNYANKFQ

KNPDEIMFSTLKTHFDDETLAKMLIVAKEDSSNIATKLEKVEFDQWLNSGKTSDDVFKLL

SLNDDTGNLLKNPIFKTWVLYVTKTGKQSPYDAVFSKLLARYDDLSLAKLIYAAKRDHAM

SSIARNLEAAQLKAWSKSGKSSDDVFKLLSLEKVGGVDLLKRSLLNVWMAYVKMLKKNSD

EVLLSKLKLRHSDEWLVKMLLVAEKDYRSKDIAKRLQGSLQKTWINDGKTADDVFNLLKL

GTGDLVFTSPMWSTWNTYVDKTKQTEP

>g537340

MYLVLKAQFGEEKFKTIIDKAKTNMITKNIADKLQEEAWRSEGKTMDDIFKLLKLGEKGD

KFVESPMLTTWISYVTTLEKLKEKPNEFVAISYLEKRFGDLTLARILSTEKHQHSRIPET

VVADLQQLQFRQWMNKGVDPKYLSNWLVSDTSNMPGKLLVTLDFSDFYKIHGVPFY

CLUSTAL O(1.2.4) multiple sequence alignment

g537330 MNKAFLHIRNLRVTILLAVVIFQSCISATSTDFPIINSSSLYLTSRLDQNVVQNKRNLRI 60

g537340 ------------------------------------------------------------ 0

g537330 HVLATTEDSSDERGINLGATTVAKLKDLTTSATQKLEKFAVSAKLKTLKNNQLATDKSFA 120

g537340 ------------------------------------------------------------ 0

g537330 KFDVGTSKSNVFESARFQKWFNSVHKAYKQNVEESEVAVVTTLTKHYGDESLTKLLSEAK 180

g537340 --------------------------------------MYLVLKAQFGEEKFKTIIDKAK 22

: .*. ::*:*.:..::.:**

g537330 TIPNTKVIAEKLEDARLTKWLTEQKSVDDIFNLLKLDETGENIFKSPLLSSWVNYANKFQ 240

g537340 TNMITKNIADKLQ---EEAWRSEGKTMDDIFKLLKLGEKGDKFVESPMLTTWISYVTTLE 79

* ** **:**: * :* *::****:****.*.*:::.:**:*::*:.*...::

g537330 K---NPDE-IMFSTLKTHFDDETLAKMLIVAKEDSSN----IATKLEKVEFDQWLNSGKT 292

g537340 KLKEKPNEFVAISYLEKRFGDLTLARILSTEKHQHSRIPETVVADLQQLQFRQWMNKGVD 139

* :*:* : :* *:.:*.* ***::* . *.: *. :.:.*::::* **:*.*

g537330 SDDVFKLLSL--NDDTGNLLKNPIFKTWVLYVTKTGKQSPYDAVFSKLLARYDDLSLAKL 350

g537340 PKYLSNWLVSDTSNMPGKLLVTLDFSDFYK---IH--GVPFY------------------ 176

. : : * .: *:** . *. : *:

g537330 IYAAKRDHAMSSIARNLEAAQLKAWSKSGKSSDDVFKLLSLEKVGGVDLLKRSLLNVWMA 410

g537340 ------------------------------------------------------------ 176

g537330 YVKMLKKNSDEVLLSKLKLRHSDEWLVKMLLVAEKDYRSKDIAKRLQGSLQKTWINDGKT 470

g537340 ------------------------------------------------------------ 176

g537330 ADDVFNLLKLGTGDLVFTSPMWSTWNTYVDKTKQTEP 507

g537340 ------------------------------------- 176

**Set 2**

| PmGH34_PBPs_010 | g539450 | Putative effector peptide |
| --- | --- | --- |
| PmGH34_PBPs_010 | g539460 | Putative effector peptide |
| PmGH34_PBPs_010 | g539470 | Secreted RxLR effector |
| PmGH34_PBPs_010 | g539480 | Secreted RxLR effector |

>g539450

MLNDWVRKKVSADGIFIRLQLDKTGYKLLESPRLITWVKYADALNIKTQGTSAPAISKLT

DYYGDAALARMIEVAKKNPSSKNIASDLETMQFNYWVNSFATPDEVFILLELRFGRDKLL

DNPLFSTWLNYITFFDGTHPSI

>g539460

MASNQPVFAVEDEVIIHSRQLLRTNVAMGDEHEERYPEPPYSKIETLKSLFTPKTISEDM

INRWLKNKKSVDKVFVRLKLENTPEDKLLENPHFITWINYAKALNSETGSPSWSTVSKLT

KYYDDDDIARIIETAKQTPGMEALASDLHTQQFQYWLHIAKKPEYVFRSLRLIDAKEELL

RNPSKNPLFMIWLDYVKYYNKHKDRKKGYLSTLGTRFWFDDDEISTMVKVAKKTPSTTEF

AKQLRAEQVDRWFTYGWPPSKVWKYLRFDVVGDDLLASPEFKLLSTYVDRFNKKNPDNKT

TVVTALNEYSRRTTSTAILAALRSKTSDLTNQVETALIKLWLTKYDPTEVFKILNLHQSR

TKLLKNPLLITWGKYVYAFNVKNPNKRATPVEILRNQFGDRELYKMLVKKNNAPSLKKP

>g539470

MTLHHVYLIAFAIMVNITVGFPSHIVSKLPTFFADEQVIFSKRFLRTASDVIEENEERAP

QLPISKIETLKSLTTSANIPDDMFNRWVKKKKSVDKVFIRLSLNKKEEKLLNNPHFVTWI

NYVKALDAATDGPSWTAISKLTKYYGDRDVAKVIEAAKKKPGMEKIADDLHAQQFQYWLN

SYDTDTPYYVFRSLALPFDYYKPLENPLFLSWIDYVNFFNKNRSPKDQEGFLATLGTKYM

YNDNGISKLVEAAKKKPNTMDFGEKLRAEQIERSLANGVSPTDVWGYLKYDVVGGKVFDS

PNFKTLATYVDRFNTKHPGKETTLASVIMNHYYTNDPTNVVINVLKNTKPGTEQIVKQVQ

AEVFNIWEKSDVDPSLAFVKLALHKTPSELFSNPLFNTWTAYVNVLNAKNPNMRTEVVDV

LRARFGDSTLSKMLAEAKAVPSSKDLATKLKASLLAKMTTEDKPPVNAN

>g539480

MHPLYLAFLIAFTLFASVHASHSPTFVVEDENKGDIDSRRFLNANSAVNEERLPQLPTSN

IEKIKSFTTPATISDDIFNRWVKEKKSVDKVFVRLNLKTTKQDKLVENPHFVTWIKYVKA

LDAKTEGPSSSAVSKLTEYYGDRVVAQIIEGVKIKPGMEKLASDLQTQQFQYWLHQYMSQ

TPDGVFRSLGLGFEMAKLLENPSKNPLFMTWINYVKFYNKHAKIDGYLPTLGAKFRYNDN

EISRMVEVARKTPSTMEFAKKLRAEQVDRWFTYGWHPSKVWLNLRHDVDGKNVFASPEFK

LLSTYVDRFNTKYPDKKITVVSALNEYSRRTTSKAILTALRSKTPDITNQVETALIKLWL

TKYDPTEVFKILNLHQSRTKLLKNPLLITWGKYVYAFNMKNPNKRTTPMEILRNQFGEKK

LYKMLVLEKNVPSS

CLUSTAL O(1.2.4) multiple sequence alignment

g539460 ------------------------MASNQPVFAVEDEVIIHSRQLLRTNVAMGDEHEERY 36

g539470 MTLHHVYLIAFAIMVNITVGFPSHIVSKLPTFFA-DEQVIFSKRFLRTASDVIEENEERA 59

:.*: *.* . ** :*.*:::*** : :*:***

g539460 PEPPYSKIETLKSLFTPKTISEDMINRWLKNKKSVDKVFVRLKLENTPEDKLLENPHFIT 96

g539470 PQLPISKIETLKSLTTSANIPDDMFNRWVKKKKSVDKVFIRLSLNK-KEEKLLNNPHFVT 118

*: * ********* * .* :**:***:*:********:**.*:: *:***:****:*

g539460 WINYAKALNSETGSPSWSTVSKLTKYYDDDDIARIIETAKQTPGMEALASDLHTQQFQYW 156

g539470 WINYVKALDAATDGPSWTAISKLTKYYGDRDVAKVIEAAKKKPGMEKIADDLHAQQFQYW 178

****.***:: *..***:::*******.* *:*::**:**:.**** :*.***:******

g539460 LHIA--KKPEYVFRSLRLIDAKEELLRNPSKNPLFMIWLDYVKYYNKHKD--RKKGYLST 212

g539470 LNSYDTDTPYYVFRSLALPFD----YYKPLENPLFLSWIDYVNFFNKNRSPKDQEGFLAT 234

*: ..* ****** * :* :****: *:***:::**::. ::*:*:*

g539460 LGTRFWFDDDEISTMVKVAKKTPSTTEFAKQLRAEQVDRWFTYGWPPSKVWKYLRFDVVG 272

g539470 LGTKYMYNDNGISKLVEAAKKKPNTMDFGEKLRAEQIERSLANGVSPTDVWGYLKYDVVG 294

***:: ::*: **.:*:.***.*.* :*.::*****::* :: * *:.** **::****

g539460 DDLLASPEFKLLSTYVDRFNKKNPDNKTTVVTAL-NEYSRRTTSTAIL---AALRSKTSD 328

g539470 GKVFDSPNFKTLATYVDRFNTKHPGKETTLASVIMNHYYTNDPTNVVINVLKNTKPGTEQ 354

..:: **:** *:*******.*:*.::**:.:.: *.* . :..:: : *.:

g539460 LTNQVETALIKLWLT-KYDPTEVFKILNLHQSRTKLLKNPLLITWGKYVYAFNVKNPNKR 387

g539470 IVKQVQAEVFNIWEKSDVDPSLAFVKLALHKTPSELFSNPLFNTWTAYVNVLNAKNPNMR 414

:.:**:: ::::* . . **: .* * **:: ::*:.***: ** ** .:*.**** *

g539460 ATPVEILRNQFGDRELYKMLVKKNNAPSLKKP----------------------- 419

g539470 TEVVDVLRARFGDSTLSKMLAEAKAVPSSKDLATKLKASLLAKMTTEDKPPVNAN 469

: *::** :*** * ***.: : .** *.

CLUSTAL O(1.2.4) multiple sequence alignment

g539450 ------------------------------------------------------------ 0

g539470 MTLHHVYLIAFAIMVNITVGFPSHIVSKLPTFFADEQVIFSKRFLRTASDVIEENEERAP 60

g539450 ----------------------MLNDWVRKKVSADGIFIRLQLDKTGYKLLESPRLITWV 38

g539470 QLPISKIETLKSLTTSANIPDDMFNRWVKKKKSVDKVFIRLSLNKKEEKLLNNPHFVTWI 120

*:* **:** *.* :****.*:*. ***:.*:::**:

g539450 KYADALNIKTQGTSAPAISKLTDYYGDAALARMIEVAKKNPSSKNIASDLETMQFNYWVN 98

g539470 NYVKALDAATDGPSWTAISKLTKYYGDRDVAKVIEAAKKKPGMEKIADDLHAQQFQYWLN 180

:*..**: *:* * ******.**** :*::**.***:*. ::**.**.: **:**:*

g539450 SFATPDE--VFILLELRFGRDKLLDNPLFSTWLNYITFFDGTHPSI-------------- 142

g539470 SYDTDTPYYVFRSLALPFDYYKPLENPLFLSWIDYVNFFNKNRSPKDQEGFLATLGTKYM 240

*: * ** * * *. * *:**** :*::*:.**: .:

g539450 ------------------------------------------------------------ 142

g539470 YNDNGISKLVEAAKKKPNTMDFGEKLRAEQIERSLANGVSPTDVWGYLKYDVVGGKVFDS 300

g539450 ------------------------------------------------------------ 142

g539470 PNFKTLATYVDRFNTKHPGKETTLASVIMNHYYTNDPTNVVINVLKNTKPGTEQIVKQVQ 360

g539450 ------------------------------------------------------------ 142

g539470 AEVFNIWEKSDVDPSLAFVKLALHKTPSELFSNPLFNTWTAYVNVLNAKNPNMRTEVVDV 420

g539450 ------------------------------------------------- 142

g539470 LRARFGDSTLSKMLAEAKAVPSSKDLATKLKASLLAKMTTEDKPPVNAN 469

CLUSTAL O(1.2.4) multiple sequence alignment

g539470 -MTLHHVYLIAFAIMVNITVGFPSHIVSKLPTFFADE---QVIFSKRFLRTASDVIEENE 56

g539480 MHPLYLAFLIAFTLFAS-------VHASHSPTFVVEDENKGDIDSRRFLNANS---AVNE 50

*: .:****:::.. .*: ***..:: * *:***.: * **

g539470 ERAPQLPISKIETLKSLTTSANIPDDMFNRWVKKKKSVDKVFIRLSLNK-KEEKLLNNPH 115

g539480 ERLPQLPTSNIEKIKSFTTPATISDDIFNRWVKEKKSVDKVFVRLNLKTTKQDKLVENPH 110

** **** *:**.:**:** *.* **:******:********:**.*:. *::**::***

g539470 FVTWINYVKALDAATDGPSWTAISKLTKYYGDRDVAKVIEAAKKKPGMEKIADDLHAQQF 175

g539480 FVTWIKYVKALDAKTEGPSSSAVSKLTEYYGDRVVAQIIEGVKIKPGMEKLASDLQTQQF 170

*****:******* *:*** :*:****:***** **::**..* ******:*.**::***

g539470 QYWLNSYDTDTPYYVFRSLALPFDYYK----PLENPLFLSWIDYVNFFNKNRSPKDQEGF 231

g539480 QYWLHQYMSQTPDGVFRSLGLGFEMAKLLENPSKNPLFMTWINYVKFYNKHA---KIDGY 227

****:.* ::** *****.* *: * * :****::**:**:*:**: . :*:

g539470 LATLGTKYMYNDNGISKLVEAAKKKPNTMDFGEKLRAEQIERSLANGVSPTDVWGYLKYD 291

g539480 LPTLGAKFRYNDNEISRMVEVARKTPSTMEFAKKLRAEQVDRWFTYGWHPSKVWLNLRHD 287

* ***:*: **** **::**.*:*.*.**:*.:******::* :: * *:.** *::*

g539470 VVGGKVFDSPNFKTLATYVDRFNTKHPGKETTLASVIMNHYYTNDPTNVVINVLKNTKPG 351

g539480 VDGKNVFASPEFKLLSTYVDRFNTKYPDKKITVVSAL-NEYSRRTTSKAILTALR---SK 343

* * :** **:** *:*********:*.*: *:.*.: *.* . ::.::..*:

g539470 TEQIVKQVQAEVFNIWEKSDVDPSLAFVKLALHKTPSELFSNPLFNTWTAYVNVLNAKNP 411

g539480 TPDITNQVETALIKLWLT-KYDPTEVFKILNLHQSRTKLLKNPLLITWGKYVYAFNMKNP 402

* :*.:**:: ::::* . . **: .* * **:: ::*:.***: ** ** .:* ***

g539470 NMRTEVVDVLRARFGDSTLSKMLAEAKAVPSSKDLATKLKASLLAKMTTEDKPPVNAN 469

g539480 NKRTTPMEILRNQFGEKKLYKMLVLEKNVPSS-------------------------- 434

* ** :::** :**:..* ***. * ****

CLUSTAL O(1.2.4) multiple sequence alignment

g539480 MHPLYLAFLIAFTLFASVHASHSPTFVVEDENKGDIDSRRFLNANSA---VNEERLPQLP 57

g539460 ------------------MASNQPVFAVEDEV--IIHSRQLLRTNVAMGDEHEERYPEPP 40

**:.*.*.**** *.**::*.:* * :*** *: *

g539480 TSNIEKIKSFTTPATISDDIFNRWVKEKKSVDKVFVRLNLKTTKQDKLVENPHFVTWIKY 117

g539460 YSKIETLKSLFTPKTISEDMINRWLKNKKSVDKVFVRLKLENTPEDKLLENPHFITWINY 100

*:**.:**: ** ***:*::***:*:***********:*:.* :***:*****:***:*

g539480 VKALDAKTEGPSSSAVSKLTEYYGDRVVAQIIEGVKIKPGMEKLASDLQTQQFQYWLHQY 177

g539460 AKALNSETGSPSWSTVSKLTKYYDDDDIARIIETAKQTPGMEALASDLHTQQFQYWLHI- 159

.***:::* .** *:*****:**.* :*:*** .* .**** *****:*********

g539480 MSQTPDGVFRSLGLGFEMAKLLENPSKNPLFMTWINYVKFYNKHA-KIDGYLPTLGAKFR 236

g539460 -AKKPEYVFRSLRLIDAKEELLRNPSKNPLFMIWLDYVKYYNKHKDRKKGYLSTLGTRFW 218

::.*: ***** * :**.********* *::***:**** : .*** ***::*

g539480 YNDNEISRMVEVARKTPSTMEFAKKLRAEQVDRWFTYGWHPSKVWLNLRHDVDGKNVFAS 296

g539460 FDDDEISTMVKVAKKTPSTTEFAKQLRAEQVDRWFTYGWPPSKVWKYLRFDVVGDDLLAS 278

::*:*** **:**:***** ****:************** ***** **.** *.:::**

g539480 PEFKLLSTYVDRFNTKYPDKKITVVSALNEYSRRTTSKAILTALRSKTPDITNQVETALI 356

g539460 PEFKLLSTYVDRFNKKNPDNKTTVVTALNEYSRRTTSTAILAALRSKTSDLTNQVETALI 338

**************.* **:* ***:***********.***:****** *:*********

g539480 KLWLTKYDPTEVFKILNLHQSRTKLLKNPLLITWGKYVYAFNMKNPNKRTTPMEILRNQF 416

g539460 KLWLTKYDPTEVFKILNLHQSRTKLLKNPLLITWGKYVYAFNVKNPNKRATPVEILRNQF 398

******************************************:******:**:*******

g539480 GEKKLYKMLVLEKNVPSS--- 434

g539460 GDRELYKMLVKKNNAPSLKKP 419

*:::****** ::*.**

CLUSTAL O(1.2.4) multiple sequence alignment

g539480 MHPLYLAFLIAFTLFASVHASHSPTFVVEDENKGDIDSRRFLNANSAVNEERLPQLPTSN 60

g539450 ------------------------------------------------------------ 0

g539480 IEKIKSFTTPATISDDIFNRWVKEKKSVDKVFVRLNLKTTKQDKLVENPHFVTWIKYVKA 120

g539450 ----------------MLNDWVRKKVSADGIFIRLQLDKTG-YKLLESPRLITWVKYADA 43

::* **::* *.* :*:**:*..* **:*.*:::**:**..*

g539480 LDAKTEGPSSSAVSKLTEYYGDRVVAQIIEGVKIKPGMEKLASDLQTQQFQYWLHQYMSQ 180

g539450 LNIKTQGTSAPAISKLTDYYGDAALARMIEVAKKNPSSKNIASDLETMQFNYWVNSFA-- 101

*: **:* *: *:****:**** .:*::** .* :*. :::****:* **:**::.:

g539480 TPDGVFRSLGLGFEMAKLLENPSKNPLFMTWINYVKFYNKHAKIDGYLPTLGAKFRYNDN 240

g539450 TPDEVFILLELRFGRDKLLD----NPLFSTWLNYITFFDGTHPSI--------------- 142

*** ** * * * ***: **** **:**:.*::

g539480 EISRMVEVARKTPSTMEFAKKLRAEQVDRWFTYGWHPSKVWLNLRHDVDGKNVFASPEFK 300

g539450 ------------------------------------------------------------ 142

g539480 LLSTYVDRFNTKYPDKKITVVSALNEYSRRTTSKAILTALRSKTPDITNQVETALIKLWL 360

g539450 ------------------------------------------------------------ 142

g539480 TKYDPTEVFKILNLHQSRTKLLKNPLLITWGKYVYAFNMKNPNKRTTPMEILRNQFGEKK 420

g539450 ------------------------------------------------------------ 142

g539480 LYKMLVLEKNVPSS 434

g539450 -------------- 142

**Set 3**

| PmGH34_PBPs_010 | g539590 | Putative effector peptide |
| --- | --- | --- |
| PmGH34_PBPs_010 | g539600 | Putative effector peptide |
| PmGH34_PBPs_010 | g539610 | Putative effector peptide |
| PmGH34_PBPs_010 | g539620 | Secreted RxLR effector |

>g539590

MKIGKMMETEWMKHSLNKKYSPKDTFVHLGLKAAGDDVLISPAFKIWTRYLDAFNARYPE

QKVTMIDGLTANFTYQGLLWVFQTAKKDQTIEKLVKTLQENLIDKWVTLKEKPEDLKRIL

HHIEIGEEMIQRYMTKIPSVNVS

>g539600

MWLDSGETTDDVFKLLKLDDEVHFYTFQDKVLLTTWVSYVNAFFAKNPGQKDELFSALKL

RFEDRPLNEILNIAKTFPSIESAANKIQTDKIQNYLVNNVSSKRVFELLGLSEDRNHILD

SPLFQSWMQYVEAYSKKNPSKLES

>g539610

METLKSLFTPKTISDDMFNRWLKNKKSVDKVFVRLNLQNTPEDKLLENPYFTTWINYAKA

LNAETGSPSWSTVSKLTEYYDDDIIARIIEAAKKTPGMEVLASDLHTQQFQYWLHFATKP

EYVFRSLRLTDAKEELLKNPSKNPLFMLWLDYVNFYNKNMKNHQEGYLSTLGTRVWFDDD

DIFTMVEVARKTPSTMEFAKKLRAEQVDRWFTYGWHPSKVWLYLRRDVNGKNVFASPEFK

LLSTYVDRFNKKNPNEKTTVVSALNEYFRRTSTKAILAALRSKPPDISNKVETALIKTWL

TKYDPIKVFETLNLHRSRTKLLQNPLLITWGKYVYAYNVKNPDKRTTPMEILREQFGDRE

LYKMLVKKKNVPTLKNP

>g539620

MHPLYLAFLIAFTLFASVHASHSPTFVVEDENKGDIDSRRFLNANSAVNEERLPQLPTSS

IEKIKSFTTPATISDDIFNRWVKEKKSVDKVFVRLNLKTTKQDKLVENPHFVTWIKYVKA

LDAKTEGPSSSAVSKLTEYYGDRVVAQIIEGVKIKPGMEKLASDLQTQQFQYWLHQYMSQ

TPDGVFRSLGLGFEMAKLLENPSKNPLFMTWINYVKFYNKHAKIDGYLPTLGAKFRYNDN

EISRMVEVARKTPSTMEFAKKLRAEQVDRWFTYGWHPSKVWLNLRHDVDGKNVFASPEFK

LLSTYVDRFNTKYPDKKITVVSALNEYYRSTTSKAILTALRSKTPDITNQVEAALIKLWL

TKYDPTQVFKILNLQQSRTKLLKNPLLITWGKYVYAFNMKYPNKRTTPMEILRNQFGEKK

LYKMLVLEKNVPSS

CLUSTAL O(1.2.4) multiple sequence alignment

g539610 ------------------------------------------------------------ 0

g539620 MHPLYLAFLIAFTLFASVHASHSPTFVVEDENKGDIDSRRFLNANSAVNEERLPQLPTSS 60

g539610 METLKSLFTPKTISDDMFNRWLKNKKSVDKVFVRLNLQNTPEDKLLENPYFTTWINYAKA 60

g539620 IEKIKSFTTPATISDDIFNRWVKEKKSVDKVFVRLNLKTTKQDKLVENPHFVTWIKYVKA 120

:*.:**: ** *****:****:*:*************:.* :***:***:*.***:*.**

g539610 LNAETGSPSWSTVSKLTEYYDDDIIARIIEAAKKTPGMEVLASDLHTQQFQYWLHF--AT 118

g539620 LDAKTEGPSSSAVSKLTEYYGDRVVAQIIEGVKIKPGMEKLASDLQTQQFQYWLHQYMSQ 180

*:*:* .** *:********.* ::*:***..* .**** *****:********* :

g539610 KPEYVFRSLRLTDAKEELLKNPSKNPLFMLWLDYVNFYNKNMKNHQEGYLSTLGTRVWFD 178

g539620 TPDGVFRSLGLGFEMAKLLENPSKNPLFMTWINYVKFYNKHA--KIDGYLPTLGAKFRYN 238

.*: ***** * :**:********* *::**:****: : :*** ***::. ::

g539610 DDDIFTMVEVARKTPSTMEFAKKLRAEQVDRWFTYGWHPSKVWLYLRRDVNGKNVFASPE 238

g539620 DNEISRMVEVARKTPSTMEFAKKLRAEQVDRWFTYGWHPSKVWLNLRHDVDGKNVFASPE 298

*::* ************************************** **:**:*********

g539610 FKLLSTYVDRFNKKNPNEKTTVVSALNEYFRRTSTKAILAALRSKPPDISNKVETALIKT 298

g539620 FKLLSTYVDRFNTKYPDKKITVVSALNEYYRSTTSKAILTALRSKTPDITNQVEAALIKL 358

************.* *::* *********:* *::****:***** ***:*:**:****

g539610 WLTKYDPIKVFETLNLHRSRTKLLQNPLLITWGKYVYAYNVKNPDKRTTPMEILREQFGD 358

g539620 WLTKYDPTQVFKILNLQQSRTKLLKNPLLITWGKYVYAFNMKYPNKRTTPMEILRNQFGE 418

******* :**: ***::******:*************:*:* *:**********:***:

g539610 RELYKMLVKKKNVPTLKNP 377

g539620 KKLYKMLVLEKNVPSS--- 434

::****** :****:

CLUSTAL O(1.2.4) multiple sequence alignment

g539600 ------------------------------------------------------------ 0

g539620 MHPLYLAFLIAFTLFASVHASHSPTFVVEDENKGDIDSRRFLNANSAVNEERLPQLPTSS 60

g539600 -------------------MWLDSGETTDDVFKLLKLDDEVHFYTFQDKVLLTTWVSYVN 41

g539620 IEKIKSFTTPATISDDIFNRWVKEKKSVDKVFVRLNLKTTKQ-DKLVENPHFVTWIKYVK 119

*:.. ::.*.** *:*. : .: :: :.**:.**:

g539600 AFFAKNPGQKDELFSALKLRFEDRPLNEILNIAKTFPSIESAANKIQTDKIQNYLVNNVS 101

g539620 ALDAKTEGPSSSAVSKLTEYYGDRVVAQIIEGVKIKPGMEKLASDLQTQQFQYWLHQYMS 179

*: **. * ... .* *. : ** : :*:: .* *.:*. *..:**:::* :* : :*

g539600 --SKRVFELLGLSEDRNHIL----DSPLFQSWMQYVEAYSKKNPS--------------- 140

g539620 QTPDGVFRSLGLGFEMAKLLENPSKNPLFMTWINYVKFYNKHAKIDGYLPTLGAKFRYND 239

. **. ***. : ::* ..*** :*::**: *.*:

g539600 ------------------------------------------------------------ 140

g539620 NEISRMVEVARKTPSTMEFAKKLRAEQVDRWFTYGWHPSKVWLNLRHDVDGKNVFASPEF 299

g539600 ------------------------------------------------------------ 140

g539620 KLLSTYVDRFNTKYPDKKITVVSALNEYYRSTTSKAILTALRSKTPDITNQVEAALIKLW 359

g539600 --------------------------------------------KLES------------ 144

g539620 LTKYDPTQVFKILNLQQSRTKLLKNPLLITWGKYVYAFNMKYPNKRTTPMEILRNQFGEK 419

* :

g539600 --------------- 144

g539620 KLYKMLVLEKNVPSS 434

CLUSTAL O(1.2.4) multiple sequence alignment

g539590 ------------------------------------------------------------ 0

g539620 MHPLYLAFLIAFTLFASVHASHSPTFVVEDENKGDIDSRRFLNANSAVNEERLPQLPTSS 60

g539590 ------------------------------------------------------------ 0

g539620 IEKIKSFTTPATISDDIFNRWVKEKKSVDKVFVRLNLKTTKQDKLVENPHFVTWIKYVKA 120

g539590 ------------------------------------------------------------ 0

g539620 LDAKTEGPSSSAVSKLTEYYGDRVVAQIIEGVKIKPGMEKLASDLQTQQFQYWLHQYMSQ 180

g539590 ------------------------------------------------------------ 0

g539620 TPDGVFRSLGLGFEMAKLLENPSKNPLFMTWINYVKFYNKHAKIDGYLPTLGAKFRYNDN 240

g539590 ---------------MKIGKMMETEWMKHSLNKKYSPKDTFVHLGLKAAGDDVLISPAFK 45

g539620 EISRMVEVARKTPSTMEFAKKLRAEQVDRWFTYGWHPSKVWLNLRHDVDGKNVFASPEFK 300

*::.* :.:* :.: :. : *...:::* .. *.:*: ** **

g539590 IWTRYLDAFNARYPEQKVTMIDGLTANFTYQGLLWVFQTAKKDQTIEKLVKTLQENLIDK 105

g539620 LLSTYVDRFNTKYPDKKITVVSALNEYYRSTTSKAILTALR--SKTPDITNQVEAALIKL 358

: : *:* **::**::*:*::..*. : :: : : .. .:.: :: **.

g539590 WVTLKEKPEDLKRILHHIEIGEEMIQ------------RYMTKIPSVNVS---------- 143

g539620 WLTKYDPTQ-VFKILNLQQSRTKLLKNPLLITWGKYVYAFNMKYPNKRTTPMEILRNQFG 417

*:* : : : :**: : :::: : * *. ..:

g539590 ----------------- 143

g539620 EKKLYKMLVLEKNVPSS 434

**Set 4**

| PmGH34_PBPs_023 | g580280 | Secreted RxLR effector |
| --- | --- | --- |
| PmGH34_PBPs_023 | g580290 | Putative effector peptide |

>g580280

MRLSHILVFATTFLASTTALSPSATTPLKALRALHEGNNNGGRILRIHEPVDEDTGDNKE

ERGGGVNNFLNKFRYQSQGAHGADDLNPTLVQQLRNNPRLFEQMRTNDVLRGNIFSAWRG

VKLHSGEVKAAMKNHGYTKEEYKQFVREYKNFKPEDLSF

>g580290

MSIYPEGLPRALHEGNNYGGRVLRIHEPIDEDKSGNQEERGGGTNFLNRFRYQSQGAHGA

EDLNQVTMARNYLQDNPTLFNRIRSDSDKRYETYSIWRGMKYHSDEVKRAMKAHGLDDDE

VRKFVNEYKAFKPATLSFKVFFWHSSLVRLLLFYLSFNSP

CLUSTAL O(1.2.4) multiple sequence alignment

g580280 MRLSHILVFATTFLASTTALSPSATTPLKALRALHEGNNNGGRILRIHEPVDEDTGDNKE 60

g580290 ----------------------MSIYPEGLPRALHEGNNYGGRVLRIHEPIDEDKSGNQE 38

: * ******** ***:******:***...*:*

g580280 ERGGGVNNFLNKFRYQSQGAHGADDLNPTLV--QQLRNNPRLFEQMRTNDVLRGNIFSAW 118

g580290 ERGGG-TNFLNRFRYQSQGAHGAEDLNQVTMARNYLQDNPTLFNRIRSDSDKRYETYSIW 97

***** .****:***********:*** . : : *::** **:::*::. * : :* *

g580280 RGVKLHSGEVKAAMKNHGYTKEEYKQFVREYKNFKPEDLSF------------------- 159

g580290 RGMKYHSDEVKRAMKAHGLDDDEVRKFVNEYKAFKPATLSFKVFFWHSSLVRLLLFYLSF 157

**:* **.*** *** ** .:* ::**.*** *** ***

g580280 --- 159

g580290 NSP 160

**Set 5**

| PmGH34_PBPs_023 | g581580 | Secreted RxLR effector |
| --- | --- | --- |
| PmGH34_PBPs_023 | g581590 | Putative effector peptide |
| PmGH34_PBPs_023 | g581600 | Secreted RxLR effector |
| PmGH34_PBPs_023 | g581610 | Secreted RxLR effector |

>g581580

MRLQYIMLMVLATLVTSNGVVSGVPVVRATEDVQLWKAADANLINTVNTEHVQPKRKRFL

RTGDTKTTDYVYDPTKKKVFIEDKLHKSLTNPKKAKKLYKRWYKRGYSVKLVTRTLNQGA

NKDVVDVYDELAKGYAAYYKKKST

>g581590

MESLYRCLQQRSELNLPTAATTMNLRYVLLVVTATIIANISIASADNAKFVKLNSVPSAQ

NEQHEFVRSLLEDDEDNAVTKPGSPRFMEQKLQKALTNPKKTAKLYEYWAQKGYTAKQIS

SEMGQTENRELSQTFTKLSKGYATYLKNRK

>g581600

MHLHYVMVMIVAILAAASGVLEAKVMDTNLRNVDASTPINSINTVPTEISSTRKLRGAAT

NADKTNVHYYPSKGKKKPFIEVRIKKALSNPKKTRKLYEQWYQSGFTPKQVARGLTQDDN

RGLDGTYKRVAKGYAKFVKEKRSQQQTM

>g581610

MRLHYVLVMVAATLAAVNGVSEAKVMDTNLRNIEDVAPINSINTAPTEISSTRKLRGADT

NVDKTNVHYYPSKGKKKPFIEVRIKKALSNPKKTRKLYAQWYQSGFTPKQVARGLTQDEN

RGLDETYKRVAKGYAVYVKEKRSPQQTM

CLUSTAL O(1.2.4) multiple sequence alignment

g581580 ----------------------MRLQYIMLMVLATLVTSNGVVSGVPVVRATEDVQLWKA 38

g581590 MESLYRCLQQRSELNLPTAATTMNLRYVLLVVTATIIANISIASA--------------- 45

*.*:*::*:* **:::. .:.*.

g581580 ADANLINTVNTEHVQPKRKRFLRTGDTKTTDYVYDPTKKKVFIEDKLHKSLTNPKKAKKL 98

g581590 DNAKFVKLNSVPSAQNEQHEFVRSLLEDDEDNAVTKPGSPRFMEQKLQKALTNPKKTAKL 105

:*:::: .. .* :::.*:*: . * . . *:*:**:*:******: **

g581580 YKRWYKRGYSVKLVTRTLNQGANKDVVDVYDELAKGYAAYYKKKST 144

g581590 YEYWAQKGYTAKQISSEMGQTENRELSQTFTKLSKGYATYLKNRK- 150

*: * ::**:.* :: :.* *::: :.: :*:****:* *::.

CLUSTAL O(1.2.4) multiple sequence alignment

g581590 MESLYRCLQQRSELNLPTAATTMNLRYVLLVVTATIIANISIASAD-----------NAK 49

g581600 ----------------------MHLHYVMVMIVAILAAASGVLEAKVMDTNLRNVDASTP 38

*:*:**::::.* : * .: .*. .:

g581590 FVKLNSVPSAQNEQHEFVRSLLEDDEDNA---VTKPGSPRFMEQKLQKALTNPKKTAKLY 106

g581600 INSINTVPTEISSTRKLRGAATNADKTNVHYYPSKGKKKPFIEVRIKKALSNPKKTRKLY 98

: .:*:**: .. ::: : : *: *. :* . *:* :::***:***** ***

g581590 EYWAQKGYTAKQISSEMGQTENRELSQTFTKLSKGYATYLKNRK------ 150

g581600 EQWYQSGFTPKQVARGLTQDDNRGLDGTYKRVAKGYAKFVKEKRSQQQTM 148

* * *.*:* **:: : * :** *. *:.:::****.::*:::

CLUSTAL O(1.2.4) multiple sequence alignment

g581590 MESLYRCLQQRSELNLPTAATTMNLRYVLLVVTATIIANISIASAD-----------NAK 49

g581610 ----------------------MRLHYVLVMVAATLAAVNGVSEAKVMDTNLRNIEDVAP 38

*.*:***::*:**: * .::.*. *

g581590 FVKLNSVPSAQNEQHEFVRSLLEDDED---NAVTKPGSPRFMEQKLQKALTNPKKTAKLY 106

g581610 INSINTAPTEISSTRKLRGADTNVDKTNVHYYPSKGKKKPFIEVRIKKALSNPKKTRKLY 98

: .:*:.*: .. ::: : : *: :* . *:* :::***:***** ***

g581590 EYWAQKGYTAKQISSEMGQTENRELSQTFTKLSKGYATYLKNRK------ 150

g581610 AQWYQSGFTPKQVARGLTQDENRGLDETYKRVAKGYAVYVKEKRSPQQTM 148

* *.*:* **:: : * *** *.:*:.:::****.*:*:::

CLUSTAL O(1.2.4) multiple sequence alignment

g581580 MRLQYIMLMVLATLVTSNGVVSGVPVVRATEDVQLWKAADANLINTVNTEHVQPKRKRFL 60

g581600 MHLHYVMVMIVAILAAASGVLEAKVMD-----TNLRNVDASTPINSINTVPTEISSTRKL 55

g581610 MRLHYVLVMVAATLAAVNGVSEAKVMD-----TNLRNIEDVAPINSINTAPTEISSTRKL 55

*:*:*:::*: * *.: .** .. : .:* : **::** .: . .* *

g581580 RTGD----TKTTDYVYDPTKKKVFIEDKLHKSLTNPKKAKKLYKRWYKRGYSVKLVTRTL 116

g581600 RGAATNADKTNVHYYPSKGKKKPFIEVRIKKALSNPKKTRKLYEQWYQSGFTPKQVARGL 115

g581610 RGADTNVDKTNVHYYPSKGKKKPFIEVRIKKALSNPKKTRKLYAQWYQSGFTPKQVARGL 115

* . .....* . *** *** :::*:*:****::*** :**: *:: * *:* *

g581580 NQGANKDVVDVYDELAKGYAAYYKKKST----- 144

g581600 TQDDNRGLDGTYKRVAKGYAKFVKEKRSQQQTM 148

g581610 TQDENRGLDETYKRVAKGYAVYVKEKRSPQQTM 148

.*. *:.: .*..:***** : *:* :

CLUSTAL O(1.2.4) multiple sequence alignment

g581600 MHLHYVMVMIVAILAAASGVLEAKVMDTNLRNVDASTPINSINTVPTEISSTRKLRGAAT 60

g581610 MRLHYVLVMVAATLAAVNGVSEAKVMDTNLRNIEDVAPINSINTAPTEISSTRKLRGADT 60

*:****:**:.* ***..** ***********:: :*******.************* *

g581600 NADKTNVHYYPSKGKKKPFIEVRIKKALSNPKKTRKLYEQWYQSGFTPKQVARGLTQDDN 120

g581610 NVDKTNVHYYPSKGKKKPFIEVRIKKALSNPKKTRKLYAQWYQSGFTPKQVARGLTQDEN 120

*.************************************ *******************:*

g581600 RGLDGTYKRVAKGYAKFVKEKRSQQQTM 148

g581610 RGLDETYKRVAKGYAVYVKEKRSPQQTM 148

**** ********** :****** ****
